# Supplementary material
Source: bioRxiv or medRxiv preprint supplement (https://www.biorxiv.org/highwire/filestream/14377/field_highwire_adjunct_files/0/052431-1.pdf)
Supplement: Supplementary file [file 052431-1.pdf]

**A**

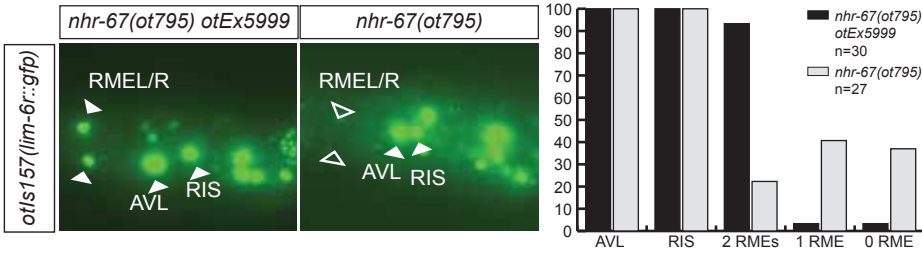

**B**

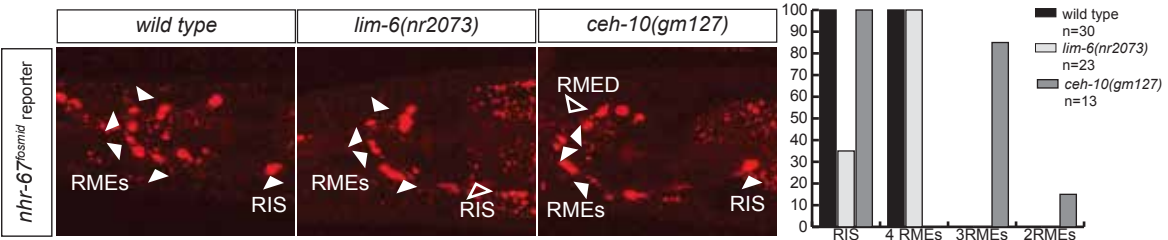

**Suppl. Figure S1: Regulatory relation of *nhr-67* and other homeobox genes**

**A:** *lim-6* expression is regulated by *nhr-67* in RMEL/R but not in RIS or AVL.

**B:** *nhr-67* fosmid expression is controlled by *ceh-10* in RMED and by *lim-6* in RIS.

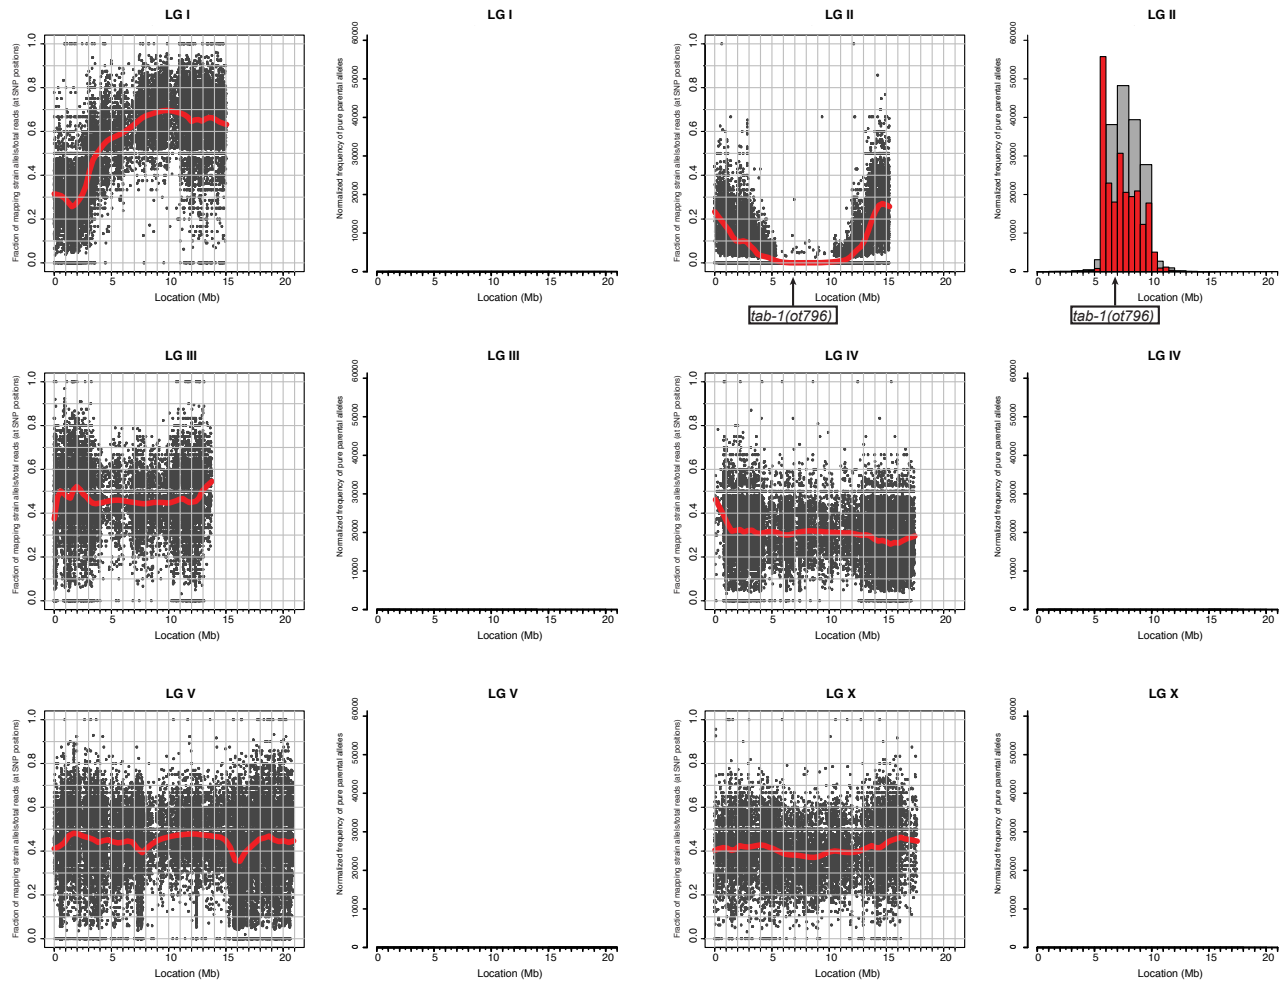

**Suppl.Fig.S2:** Whole genome sequencing data for *tab-1* mutant identification. A previously described mapping/sequencing approach was used (Doitsidou et al., 2010), employing the CloudMap data analysis pipeline (Minevich et al., 2012).

**Suppl. Table S2: GABA-negative, *unc-47*/*VGAT*-expressing neurons**

| Cells    | anti-GABA | <i>unc-47</i> fosmid reporter | <i>unc-46</i> fosmid reporter | other neurotransmitter |
|----------|-----------|-------------------------------|-------------------------------|------------------------|
| AIB      | -         | +/-                           | -                             | Glu                    |
| AIN      | -         | ++                            | -                             | Glu                    |
| AIY      | -         | +                             | -                             | ACh                    |
| ALN      | -         | +                             | -                             | ACh                    |
| ASE      | -         | +                             | -                             | Glu                    |
| AUA      | -         | +/-                           | -                             | none                   |
| AVG      | -         | +                             | -                             | none                   |
| AVK      | -         | +                             | -                             | Glu                    |
| CEPV     | -         | +                             | -                             | dopamine               |
| DVA      | -         | ++                            | -                             | ACh                    |
| FLP      | -         | +                             | -                             | Glu                    |
| IL1      | -         | +                             | -                             | Glu                    |
| OLL      | -         | +/-                           | -                             | Glu                    |
| PLN      | -         | +                             | -                             | ACh                    |
| RIA      | -         | +/-                           | ++                            | Glu                    |
| RID      | -         | ++                            | -                             | none                   |
| RIF      | -         | ++                            | -                             | ACh                    |
| RIM      | -         | +/-                           | -                             | Glu                    |
| RIV      | -         | +                             | -                             | ACh                    |
| RMDD/V   | -         | -                             | ++                            | ACh                    |
| SIA      | -         | ++                            | -                             | ACh                    |
| URX      | -         | ++                            | -                             | ACh                    |
| URY      | -         | +/-                           | -                             | Glu                    |
| MI       | -         | ++                            | -                             | Glu                    |
| M1       | -         | +                             | -                             | ACh                    |
| M2       | -         | +                             | +                             | ACh                    |
| M3       | -         | +                             | -                             | ACh                    |
| M4       | -         | ++                            | -                             | ACh                    |
| M5       | -         | +                             | -                             | ACh/Glu                |
| I2       | -         | ++                            | -                             | Glu                    |
| I4 or I6 | -         | ++                            | -                             | none                   |
| I5       | -         | +                             | -                             | Glu                    |
| NSM      | -         | +                             | -                             | 5HT                    |

**Suppl. Table S2: Summary of expression of GABA<sub>A</sub> receptors**

*gab-1*, *lgc-37*, *lgc-38* expression is from this paper (Fig.4), *exp-1* is from Beg et al., 2003, *lgc-35* from Jobson et al., 2015 and *unc-49* from Bamber et al., 1999.

| cell type | <i>gab-1</i> | <i>lgc-37</i> | <i>lgc-38</i> | <i>exp-1</i> | <i>lgc-35</i> | <i>unc-49</i> |
|-----------|--------------|---------------|---------------|--------------|---------------|---------------|
| A/B MNs   |              |               |               |              |               |               |
| ADE       |              |               |               |              |               |               |
| AIB       |              |               |               |              |               |               |
| AIN       |              |               |               |              |               |               |
| AIY       |              |               |               |              |               |               |
| AIZ       |              |               |               |              |               |               |
| ASH       |              |               |               |              |               |               |
| AVA       |              |               |               |              |               |               |
| AVD       |              |               |               |              |               |               |
| AVE       |              |               |               |              |               |               |
| CEP       |              |               |               |              |               |               |
| DVA       |              |               |               |              |               |               |
| DVA       |              |               |               |              |               |               |
| FLP       |              |               |               |              |               |               |
| HSN       |              |               |               |              |               |               |
| IL2       |              |               |               |              |               |               |
| M3        |              |               |               |              |               |               |
| MC        |              |               |               |              |               |               |
| MI        |              |               |               |              |               |               |
| PDA       |              |               |               |              |               |               |
| PLM       |              |               |               |              |               |               |
| PLN       |              |               |               |              |               |               |
| PVC       |              |               |               |              |               |               |
| PVR       |              |               |               |              |               |               |
| PVT       |              |               |               |              |               |               |
| PVW       |              |               |               |              |               |               |
| RID       |              |               |               |              |               |               |
| RIV       |              |               |               |              |               |               |
| RMF       |              |               |               |              |               |               |
| SABD      |              |               |               |              |               |               |
| SIA       |              |               |               |              |               |               |
| SMD       |              |               |               |              |               |               |
| URA       |              |               |               |              |               |               |
| URB       |              |               |               |              |               |               |
| URX       |              |               |               |              |               |               |
| muscle    |              |               |               |              |               |               |

**Table S2: List of all neurotransmitters**

| Class | Neuron | Neurotransmitter   | Cotransmitter | Comments                     |
|-------|--------|--------------------|---------------|------------------------------|
| ADA   | ADAL   | Glu                |               |                              |
|       | ADAR   | Glu                |               |                              |
| ADE   | ADEL   | DA                 |               |                              |
|       | ADER   | DA                 |               |                              |
| ADF   | ADFL   | ACh                | 5HT           |                              |
|       | ADFR   | ACh                | 5HT           |                              |
| ADL   | ADLL   | Glu                |               |                              |
|       | ADLR   | Glu                |               |                              |
| AFD   | AFDL   | Glu                |               |                              |
|       | AFDR   | Glu                |               |                              |
| AIA   | AIAL   | ACh                |               |                              |
|       | AIAR   | ACh                |               |                              |
| AIB   | AIBL   | Glu                |               |                              |
|       | AIBR   | Glu                |               |                              |
| AIM   | AIML   | Glu                | 5HT           |                              |
|       | AIMR   | Glu                | 5HT           |                              |
| AIN   | AINL   | ACh                |               |                              |
|       | AINR   | ACh                |               |                              |
| AIY   | AIYL   | ACh                |               |                              |
|       | AIYR   | ACh                |               |                              |
| AIZ   | AIZL   | Glu                |               |                              |
|       | AIZR   | Glu                |               |                              |
| ALA   | ALA    | GABA               |               |                              |
| ALM   | ALML   | Glu                |               |                              |
|       | ALMR   | Glu                |               |                              |
| ALN   | ALNL   | ACh                |               |                              |
|       | ALNR   | ACh                |               |                              |
| AQR   | AQR    | Glu                |               |                              |
| AS    | AS1    | ACh                |               |                              |
|       | AS2    | ACh                |               |                              |
|       | AS3    | ACh                |               |                              |
|       | AS4    | ACh                |               |                              |
|       | AS5    | ACh                |               |                              |
|       | AS6    | ACh                |               |                              |
|       | AS7    | ACh                |               |                              |
|       | AS8    | ACh                |               |                              |
|       | AS9    | ACh                |               |                              |
|       | AS10   | ACh                |               |                              |
|       | AS11   | ACh                |               |                              |
| ASE   | ASEL   | Glu                |               |                              |
|       | ASER   | Glu                |               |                              |
| ASG   | ASGL   | Glu                |               |                              |
|       | ASGR   | Glu                |               |                              |
| ASH   | ASHL   | Glu                |               |                              |
|       | ASHR   | Glu                |               |                              |
| ASI   | ASIL   | Unknown (orphan)   |               |                              |
|       | ASIR   | Unknown (orphan)   |               |                              |
| ASJ   | ASJL   | ACh                |               |                              |
|       | ASJR   | ACh                |               |                              |
| ASK   | ASKL   | Glu                |               |                              |
|       | ASKR   | Glu                |               |                              |
| AUA   | AUAL   | Glu                |               |                              |
|       | AUAR   | Glu                |               |                              |
| AVA   | AVAL   | ACh                |               | also GABA, but usage unclear |
|       | AVAR   | ACh                |               | also GABA, but usage unclear |
| AVB   | AVBL   | ACh                |               | also GABA, but usage unclear |
|       | AVBR   | ACh                |               | also GABA, but usage unclear |
| AVD   | AVDL   | ACh                |               |                              |
|       | AVDR   | ACh                |               |                              |
| AVE   | AVEL   | ACh                |               |                              |
|       | AVER   | ACh                |               |                              |
| AVF   | AVFL   | GABA               |               | Clearance neuron             |
|       | AVFR   | GABA               |               | Clearance neuron             |
| AVG   | AVG    | ACh                |               |                              |
| AVH   | AVHL   | Unknown (orphan)   |               | GABA, but usage unclear      |
|       | AVHR   | Unknown (orphan)   |               | GABA, but usage unclear      |
| AVJ   | AVJL   | Unknown (orphan)   |               |                              |
|       | AVJR   | Unknown (orphan)   |               |                              |
| AVK   | AVKL   | Unknown (orphan)   |               |                              |
|       | AVKR   | Unknown (orphan)   |               |                              |
| AVL   | AVL    | GABA               |               |                              |
| AVM   | AVM    | Glu                |               |                              |
| AWA   | AWAL   | Unknown (orphan)   |               |                              |
|       | AWAR   | Unknown (orphan)   |               |                              |
| AWB   | AWBL   | ACh                |               |                              |
|       | AWBR   | ACh                |               |                              |
| AWC   | AWCL   | Glu                |               |                              |
|       | AWCR   | Glu                |               |                              |
| BAG   | BAGL   | Glu                |               |                              |
|       | BAGR   | Glu                |               |                              |
| BDU   | BDUL   | Unknown (orphan)   |               |                              |
|       | BDUR   | Unknown (orphan)   |               |                              |
| CAN   | CANL   | unknown MA (cat-1) |               |                              |
|       | CANR   | unknown MA (cat-1) |               |                              |
| CEP   | CEPDL  | DA                 |               |                              |
|       | CEPDR  | DA                 |               |                              |
|       | CEPVL  | DA                 |               |                              |
|       | CEPVR  | DA                 |               |                              |
| DA    | DA1    | ACh                |               |                              |
|       | DA2    | ACh                |               |                              |
|       | DA3    | ACh                |               |                              |
|       | DA4    | ACh                |               |                              |
|       | DA5    | ACh                |               |                              |
|       | DA6    | ACh                |               |                              |
|       | DA7    | ACh                |               |                              |
|       | DA8    | ACh                |               |                              |
|       | DA9    | ACh                |               |                              |
| DB    | DB1/3  | ACh                |               |                              |
|       | DB2    | ACh                |               |                              |
|       | DB3/1  | ACh                |               |                              |
|       | DB4    | ACh                |               |                              |
|       | DB5    | ACh                |               |                              |
|       | DB6    | ACh                |               |                              |
|       | DB7    | ACh                |               |                              |
| DD    | DD1    | GABA               |               |                              |
|       | DD2    | GABA               |               |                              |

|     |       |                  |             |  |
|-----|-------|------------------|-------------|--|
|     | DD3   | GABA             |             |  |
|     | DD4   | GABA             |             |  |
|     | DD5   | GABA             |             |  |
|     | DD6   | GABA             |             |  |
| DVA | DVA   | ACh              |             |  |
| DVB | DVB   | GABA             |             |  |
| DVC | DVC   | Glu              |             |  |
| FLP | FLPL  | Glu              |             |  |
|     | FLPR  | Glu              |             |  |
| HSN | HSNL  | ACh (minor)      | 5HT         |  |
|     | HSNR  | ACh (minor)      | 5HT         |  |
| IL1 | IL1DL | Glu              |             |  |
|     | IL1DR | Glu              |             |  |
|     | IL1L  | Glu              |             |  |
|     | IL1R  | Glu              |             |  |
|     | IL1VL | Glu              |             |  |
|     | IL1VR | Glu              |             |  |
| IL2 | IL2DL | ACh              |             |  |
|     | IL2DR | ACh              |             |  |
|     | IL2L  | ACh              |             |  |
|     | IL2R  | ACh              |             |  |
|     | IL2VL | ACh              |             |  |
|     | IL2VR | ACh              |             |  |
| LUA | LUAL  | Glu              |             |  |
|     | LUAR  | Glu              |             |  |
| OLL | OLLL  | Glu              |             |  |
|     | OLLR  | Glu              |             |  |
| OLQ | OLQDL | Glu              |             |  |
|     | OLQDR | Glu              |             |  |
|     | OLQVL | Glu              |             |  |
|     | OLQVR | Glu              |             |  |
| PDA | PDA   | ACh              |             |  |
| PDB | PDB   | ACh              |             |  |
| PDE | PDEL  | DA               |             |  |
|     | PDER  | DA               |             |  |
| PHA | PHAL  | Glu              |             |  |
|     | PHAR  | Glu              |             |  |
| PHB | PHBL  | Glu              |             |  |
|     | PHBR  | Glu              |             |  |
| PHC | PHCL  | Glu              |             |  |
|     | PHCR  | Glu              |             |  |
| PLM | PLML  | Glu              |             |  |
|     | PLMR  | Glu              |             |  |
| PLN | PLNL  | ACh              |             |  |
|     | PLNR  | ACh              |             |  |
| PQR | PQR   | Glu              |             |  |
| PVC | PVCL  | ACh              |             |  |
|     | PVCR  | ACh              |             |  |
| PVD | PVDL  | Glu              |             |  |
|     | PVDR  | Glu              |             |  |
| PVM | PVM   | Unknown (orphan) |             |  |
| PVN | PVNL  | ACh              |             |  |
|     | PVNR  | ACh              |             |  |
| PVP | PVPL  | ACh              |             |  |
|     | PVPR  | ACh              |             |  |
| PVQ | PVQL  | Glu              |             |  |
|     | PVQR  | Glu              |             |  |
| PVR | PVR   | Glu              |             |  |
| PVT | PVT   | Unknown (orphan) |             |  |
| PVW | PVWL  | Unknown (orphan) |             |  |
|     | PVWR  | Unknown (orphan) |             |  |
| RIA | RIAL  | Glu              |             |  |
|     | RIAR  | Glu              |             |  |
| RIB | RIBL  | GABA             | ACh (minor) |  |
|     | RIBR  | GABA             | ACh (minor) |  |
| RIC | RICL  | Octopamine       |             |  |
|     | RICR  | Octopamine       |             |  |
| RID | RID   | Unknown (orphan) |             |  |
| RIF | RIFL  | ACh              |             |  |
|     | RIFR  | ACh              |             |  |
| RIG | RIGL  | Glu              |             |  |
|     | RIGR  | Glu              |             |  |
| RIH | RIH   | ACh              | 5HT         |  |
| RIM | RIML  | Glu              | Tyramine    |  |
|     | RIMR  | Glu              | Tyramine    |  |
| RIP | RIFL  | Unknown (orphan) |             |  |
|     | RIFR  | Unknown (orphan) |             |  |
| RIR | RIR   | ACh              |             |  |
| RIS | RIS   | GABA             |             |  |
| RIV | RIVL  | ACh              |             |  |
|     | RIVR  | ACh              |             |  |
| RMD | RMDDL | ACh              |             |  |
|     | RMDDR | ACh              |             |  |
|     | RMDL  | ACh              |             |  |
|     | RMDR  | ACh              |             |  |
|     | RMDVL | ACh              |             |  |
|     | RMDVR | ACh              |             |  |
| RME | RMED  | GABA             |             |  |
|     | RMEL  | GABA             |             |  |
|     | RMER  | GABA             |             |  |
|     | RMEV  | GABA             |             |  |
| RMF | RMFL  | ACh              |             |  |
|     | RMFR  | ACh              |             |  |
| RMG | RMGL  | Unknown (orphan) |             |  |
|     | RMGR  | Unknown (orphan) |             |  |
| RMH | RMHL  | ACh              |             |  |
|     | RMHR  | ACh              |             |  |
| SAA | SAADL | ACh              |             |  |
|     | SAADR | ACh              |             |  |
|     | SAAVL | ACh              |             |  |
|     | SAAVR | ACh              |             |  |
| SAB | SABD  | ACh              |             |  |
|     | SABVL | ACh              |             |  |
|     | SABVR | ACh              |             |  |
| SDQ | SDQL  | ACh              |             |  |
|     | SDQR  | ACh              |             |  |
| SIA | SIADL | ACh              |             |  |
|     | SIADR | ACh              |             |  |
|     | SIAVL | ACh              |             |  |
|     | SIAVR | ACh              |             |  |
| SIB | SIBDL | ACh              |             |  |
|     | SIBDR | ACh              |             |  |
|     | SIBVL | ACh              |             |  |

|                                |       |                            |      |  |
|--------------------------------|-------|----------------------------|------|--|
|                                | SIBVR | ACh                        |      |  |
| SMB                            | SMBDL | ACh                        |      |  |
|                                | SMBDR | ACh                        |      |  |
|                                | SMBVL | ACh                        |      |  |
|                                | SMBVR | ACh                        |      |  |
| SMD                            | SMDDL | ACh                        | GABA |  |
|                                | SMDDR | ACh                        | GABA |  |
|                                | SMDVL | ACh                        | GABA |  |
|                                | SMDVR | ACh                        | GABA |  |
| URA                            | URADL | ACh                        |      |  |
|                                | URADR | ACh                        |      |  |
|                                | URAVL | ACh                        |      |  |
|                                | URAVR | ACh                        |      |  |
| URB                            | URBL  | ACh                        |      |  |
|                                | URBR  | ACh                        |      |  |
| URX                            | URXL  | ACh                        |      |  |
|                                | URXR  | ACh                        |      |  |
| URY                            | URYDL | Glu                        |      |  |
|                                | URYDR | Glu                        |      |  |
|                                | URYVL | Glu                        |      |  |
|                                | URYVR | Glu                        |      |  |
| VA                             | VA1   | ACh                        |      |  |
|                                | VA2   | ACh                        |      |  |
|                                | VA3   | ACh                        |      |  |
|                                | VA4   | ACh                        |      |  |
|                                | VA5   | ACh                        |      |  |
|                                | VA6   | ACh                        |      |  |
|                                | VA7   | ACh                        |      |  |
|                                | VA8   | ACh                        |      |  |
|                                | VA9   | ACh                        |      |  |
|                                | VA10  | ACh                        |      |  |
|                                | VA11  | ACh                        |      |  |
| VB                             | VA12  | ACh                        |      |  |
|                                | VB1   | ACh                        |      |  |
|                                | VB2   | ACh                        |      |  |
|                                | VB3   | ACh                        |      |  |
|                                | VB4   | ACh                        |      |  |
|                                | VB5   | ACh                        |      |  |
|                                | VB6   | ACh                        |      |  |
|                                | VB7   | ACh                        |      |  |
|                                | VB8   | ACh                        |      |  |
|                                | VB9   | ACh                        |      |  |
|                                | VB10  | ACh                        |      |  |
| VC                             | VB11  | ACh                        |      |  |
|                                | VC1   | ACh                        |      |  |
|                                | VC2   | ACh                        |      |  |
|                                | VC3   | ACh                        |      |  |
|                                | VC4   | ACh                        | 5HT  |  |
|                                | VC5   | ACh                        | 5HT  |  |
| VD                             | VC6   | ACh                        |      |  |
|                                | VD1   | GABA                       |      |  |
|                                | VD2   | GABA                       |      |  |
|                                | VD3   | GABA                       |      |  |
|                                | VD4   | GABA                       |      |  |
|                                | VD5   | GABA                       |      |  |
|                                | VD6   | GABA                       |      |  |
|                                | VD7   | GABA                       |      |  |
|                                | VD8   | GABA                       |      |  |
|                                | VD9   | GABA                       |      |  |
|                                | VD10  | GABA                       |      |  |
|                                | VD11  | GABA                       |      |  |
|                                | VD12  | GABA                       |      |  |
| VD13                           | GABA  |                            |      |  |
| <b>SUMMARY STATS</b>           |       |                            |      |  |
| <b>EXTRAPHARYNGEAL NEURONS</b> |       |                            |      |  |
| <b>Sensory neuron:</b>         |       | <b>Sensory neuron:</b>     |      |  |
| <b>38/104 classes</b>          |       | ACh: 9 classes             |      |  |
| <b>87/282 total neurons</b>    |       | Glu: 22                    |      |  |
| <b>Motorneuron:</b>            |       | GABA: 1 (ALA)              |      |  |
| <b>24/104</b>                  |       | Aminergic: 3 (all Dopa)    |      |  |
| <b>118/282</b>                 |       | Unknown: 3 (ASI, AWA, PVM) |      |  |
| <b>Not Sens/Motor:</b>         |       | <b>Motor neuron:</b>       |      |  |
| <b>42/104</b>                  |       | ACh: 17 classes            |      |  |
| <b>77/282</b>                  |       | Glu: 1 (RIM)               |      |  |
|                                |       | GABA: 6 (incl. SMD)        |      |  |
|                                |       | Aminergic: 0               |      |  |
|                                |       | Unknown: 1 (RMG)           |      |  |
|                                |       | <b>Not Sens/Motor:</b>     |      |  |
|                                |       | ACh: 19 classes            |      |  |
|                                |       | Glu: 11                    |      |  |
|                                |       | GABA: 3 (RIS, RIB, AVF)    |      |  |
|                                |       | Aminergic: 2 (CAN, RIC)    |      |  |
|                                |       | Unknown: 8                 |      |  |
| <b>Pharyngeal neurons</b>      |       |                            |      |  |
| I1                             | I1L   | ACh                        |      |  |
|                                | I1R   | ACh                        |      |  |
| I2                             | I2L   | Glu                        |      |  |
|                                | I2R   | Glu                        |      |  |
| I3                             | I3    | ACh                        |      |  |
| I4                             | I4    | Unknown (orphan)           |      |  |
| I5                             | I5    | Glu & 5HT                  |      |  |
|                                | I6    | Unknown (orphan)           |      |  |
| M1                             | M1    | ACh                        |      |  |
|                                | M2    | ACh                        |      |  |
| M3                             | M2R   | ACh                        |      |  |
|                                | M3L   | Glu                        |      |  |
| M4                             | M3R   | Glu                        |      |  |
|                                | M4    | ACh                        |      |  |
| M5                             | M5    | ACh                        | Glu  |  |
| MC                             | MCL   | ACh                        |      |  |
|                                | MCR   | ACh                        |      |  |
| MI                             | MI    | Glu                        |      |  |
|                                | NSML  | 5HT                        |      |  |
| NSM                            | NSMR  | 5HT                        |      |  |
